# Supplementary material for: Insight into [3+2]-dehydration Cycloaddition Reaction Catalyzed by Brønsted Acid: A Theoretical Study
Source: Research Square preprint supplement (doi:10.21203/rs.3.rs-7913901/v1), 2025-11-11
Supplement: Supplementary file 1 [file dd90f11eca531335f4bee25c.docx]

*Supporting information*

**Insight into [3+2]-dehydration Cycloaddition Reaction Catalyzed by Brønsted Acid: A Theoretical Study**

Yan Zhang1*, Jia Xing Yu2, Ying Xue3, Cui Wei1* and Wen Jun Zhou1*

1*College of Chemistry and Environmental Engineering,

Neijiang Normal University, Neijiang 641100,

People’s Republic of China.

2 College of New Energy Materials and Chemistry‌，

Leshan Normal University, Leshan 614000

People’s Republic of China

3College of Chemistry,

Key Lab of Green Chemistry and Technology in Ministry of Education,

Sichuan University, Chengdu 610064,

People’s Republic of China

Coordinate

1a

0 1

C 2.68866800 -1.00034200 0.00000600

C 1.41175900 -1.49724800 0.00000400

C 0.29080200 -0.62275800 0.00001200

C 0.52343400 0.78208700 0.00000800

C 1.85787800 1.26606700 0.00001300

C 2.91803300 0.39815700 0.00001500

H -1.23190800 -2.17879700 -0.00003400

H 3.53444400 -1.68057700 -0.00000300

H 1.23578900 -2.56921900 -0.00000800

C -1.03814600 -1.11111700 -0.00000700

C -0.59490700 1.65422300 -0.00002400

H 2.02185500 2.34040500 0.00001300

H 3.93496300 0.77618200 0.00001700

C -1.87320800 1.16299000 -0.00003400

C -2.09759500 -0.23754800 -0.00003000

H -0.42430500 2.72715800 -0.00004200

H -2.72400300 1.84042000 -0.00004900

O -3.35871700 -0.74929800 -0.00007000

H -3.99741200 -0.02825700 0.00090700

2a

0 1

C -0.05802800 1.46612700 0.29918400

C 0.17340400 -0.05473900 0.29158300

C 0.05348800 0.71824600 1.58444600

H 0.81543200 2.03178700 -0.00795600

H -0.85383400 0.54926500 2.15183100

H 0.96585100 0.83274900 2.15688900

C -1.35936100 2.01292300 -0.14772000

C -1.47145500 3.10023000 -0.90513100

H -2.24964900 1.48593600 0.19065200

H -2.44032100 3.48388200 -1.20377600

H -0.59579600 3.64266600 -1.24993500

C -0.95560700 -0.90846100 -0.20671500

O -0.98168300 -1.44267400 -1.28295400

O -1.97638100 -0.96636700 0.67219600

C 1.53212000 -0.56859000 -0.07009500

O 1.77652800 -1.68342100 -0.44943600

O 2.48377600 0.36358700 0.14249900

C -3.11365700 -1.69123800 0.20177600

H -3.84891700 -1.64446800 1.00288500

H -3.50353100 -1.23482900 -0.71066600

H -2.83949900 -2.72550500 -0.01303400

C 3.81480200 -0.08136000 -0.11909600

H 3.91419400 -0.38431100 -1.16300400

H 4.46050000 0.76703000 0.09983700

H 4.06340800 -0.93203800 0.51845700

TfOH

0 1

S 0.84182100 -0.14149500 0.07892300

O 1.24343900 0.24803500 1.40914900

O 1.19909200 -1.38931000 -0.53234500

C -0.98974400 0.00716300 -0.00074700

F -1.33556000 1.23849700 0.34962200

F -1.40547800 -0.24033000 -1.22883800

F -1.51956800 -0.86267600 0.84069500

O 1.22670100 1.03781000 -0.93764900

H 1.46092500 1.82924900 -0.42483300

AcOH

0 1

C 1.39289500 -0.11082300 0.00000000

H 1.90900900 0.84632400 -0.00000900

H 1.67079200 -0.69200800 0.88131700

H 1.67079300 -0.69202500 -0.88130500

C -0.09234200 0.12424900 -0.00000100

O -0.64104700 1.19593200 0.00000000

O -0.77617800 -1.03854100 0.00000000

H -1.71611400 -0.80197000 0.00000000

TFA

0 1

C 0.59893100 -0.00047300 0.00000000

C -0.93025500 0.15991800 0.00000000

O -1.48744900 1.21821400 0.00000000

O -1.51014700 -1.03915800 0.00000000

H -2.47057400 -0.90249100 0.00000000

F 1.18278400 1.18781600 -0.00000600

F 0.98856900 -0.67650300 -1.08169500

F 0.98856800 -0.67649300 1.08170100

TsOH

0 1

C 1.93783100 -1.20883000 -0.05111300

C 0.54784500 -1.21330600 -0.09487000

C -0.12334900 0.00349500 -0.07975100

C 0.55842600 1.21647900 -0.03316900

C 1.94543800 1.19824000 0.01323400

C 2.65226100 -0.00992800 0.00937600

H 2.47721300 -2.15108100 -0.07226100

H -0.01399700 -2.13889200 -0.16190900

H 0.00373600 2.14858100 -0.05101900

H 2.49293800 2.13585900 0.04453300

C 4.15658600 -0.00919500 0.08067900

H 4.58027700 0.76738200 -0.56080100

H 4.49265600 0.18948700 1.10330900

H 4.56948200 -0.97208200 -0.22613000

S -1.89075300 0.01459100 -0.12391600

O -2.32856500 1.24362500 -0.74075100

O -2.36450400 -1.28518700 -0.56536800

O -2.27148300 0.12208900 1.44856100

H -2.68405500 -0.71865700 1.70107600

MsOH

0 1

S 0.08689900 0.12963100 0.06360200

O 0.32284100 1.37092300 -0.64422400

O 0.54660400 -0.03371200 1.43294600

O 0.77566800 -1.02191500 -0.82813300

H 1.08947400 -1.73977300 -0.24649700

C -1.62701400 -0.29265700 -0.04473500

H -2.18567200 0.47233400 0.49737000

H -1.91459600 -0.30160500 -1.09632300

H -1.77840400 -1.27148200 0.41151900

TS1

0 1

C 2.53876400 -0.80835300 0.96723100

C 1.41279800 -0.35076800 -0.02041600

C 1.25258000 -0.32540000 1.49764900

H 2.68826200 -1.88467700 0.94744200

H 1.16881900 0.68299100 1.88564100

H 0.53760400 -1.03639300 1.89200800

C 3.77915500 -0.00271300 1.04237500

C 4.98863100 -0.55529400 1.02447900

H 3.65672800 1.07226700 1.14251100

H 5.88490800 0.04792700 1.11140300

H 5.12228100 -1.62948800 0.93168200

C 1.54699100 0.92121500 -0.80554600

O 1.52446900 0.93140600 -2.02199500

O 1.70549300 1.98427000 -0.04827100

C 0.69797100 -1.40348400 -0.72281100

O 0.14110200 -1.26312600 -1.86036000

O 0.62236300 -2.56147500 -0.16104600

C 1.53348400 3.23818400 -0.73271000

H 1.59916200 3.99911700 0.04066500

H 2.31389700 3.36660500 -1.48367400

H 0.54900700 3.23602800 -1.20340000

C -0.25915100 -3.54510800 -0.75779600

H 0.11717700 -3.81942500 -1.74275900

H -0.23326600 -4.38894600 -0.07458100

H -1.25860300 -3.11703000 -0.82681400

S -1.85298500 1.22537200 0.22631800

O -3.01016800 2.07721300 0.01083800

O -1.09745600 1.40588700 1.46909600

C -2.56629800 -0.45736300 0.42822100

F -3.11713600 -0.90703700 -0.69923800

F -1.57803500 -1.33923200 0.74542100

F -3.46772100 -0.51262600 1.39636000

O -0.98760200 1.01887300 -0.96214100

H 0.23264500 -0.31477100 -2.15714900

int1

0 1

C 2.53449300 0.56623400 -1.06807900

C 1.38983200 0.34050300 -0.02013800

C 1.15666600 0.27486300 -1.51283900

H 2.84381500 1.60825100 -1.08153900

H 0.91186200 -0.71752600 -1.87425300

H 0.54509400 1.07865700 -1.90277200

C 3.63339100 -0.41652800 -1.20116100

C 4.91449000 -0.05847500 -1.21258000

H 3.34791600 -1.45728000 -1.32836600

H 5.70333100 -0.78966000 -1.34663200

H 5.21551500 0.97927400 -1.09972500

C 1.35931400 -0.89351400 0.78119700

O 1.38236900 -0.85796100 2.05350600

O 1.45860600 -2.01345700 0.16589500

C 0.94173400 1.52966000 0.74694000

O 0.76104300 1.51112100 1.96164900

O 0.78627600 2.60921900 0.01554500

C 1.13457100 -3.20792800 0.92165700

H 1.09338500 -4.00007500 0.17999200

H 1.91068600 -3.39136100 1.66432200

H 0.16302500 -3.04390200 1.38973700

C 0.18016800 3.73110300 0.68138700

H 0.77436200 4.01934500 1.54860000

H 0.15355100 4.52514200 -0.06030100

H -0.82749400 3.45215400 0.99185600

S -1.90502500 -1.15326000 -0.14701200

O -3.07097800 -1.95788100 0.17847200

O -1.18368800 -1.48446700 -1.38118600

C -2.57451000 0.52535000 -0.46852900

F -3.31292200 0.95656100 0.54866200

F -1.55660400 1.40292000 -0.62455200

F -3.30691700 0.55957100 -1.57470800

O -0.99424300 -0.87372100 0.99723400

H 1.09737600 0.10723000 2.31059600

com

1 1

C 0.71644400 -2.35879000 0.76195600

C 0.63611500 -1.54960400 -0.57367800

C 0.93218800 -3.05748000 -0.51386700

H 1.61211100 -2.08496300 1.31404300

H 0.12766100 -3.67674000 -0.89766500

H 1.93905400 -3.33901700 -0.80049000

C -0.47511200 -2.59511000 1.60913000

C -0.40765700 -2.50435200 2.93601800

H -1.39456800 -2.89604100 1.11694600

H -1.27079900 -2.72574700 3.55536900

H 0.51073400 -2.22038500 3.44374600

C -0.63350000 -1.09356200 -1.20043100

O -0.66926100 -0.09002100 -1.92453400

O -1.66735500 -1.85363200 -0.99156800

C 1.77731900 -0.66717300 -0.86834200

O 1.65324000 0.36018500 -1.59393900

O 2.92373800 -1.00718100 -0.40056100

C -2.89099500 -1.50942400 -1.68564400

H -3.67221800 -2.07549200 -1.18544700

H -3.07259200 -0.43858500 -1.61408700

H -2.79680600 -1.81111300 -2.72952200

C 4.07838000 -0.19192200 -0.74583000

H 3.86661700 0.85211600 -0.51858000

H 4.88443600 -0.57865400 -0.12877100

H 4.29438100 -0.32463000 -1.80613700

H 0.60786100 0.39123000 -1.87263900

C 2.11320100 1.66152600 1.48762000

C 0.93331000 0.98730900 1.68989700

C -0.25073000 1.37654100 1.00216400

C -0.18539400 2.47065200 0.09129100

C 1.04919800 3.14794100 -0.09497200

C 2.17259800 2.75877300 0.59074500

H -1.54939900 -0.11523100 1.91155900

H 3.00770900 1.36096000 2.02606600

H 0.87854800 0.15641900 2.38977100

C -1.48442300 0.70824800 1.20769400

C -1.36754100 2.85119800 -0.59937800

H 1.08413500 3.98444300 -0.78789700

H 3.11078000 3.28613100 0.44916500

C -2.55125800 2.19370500 -0.39076500

C -2.60949500 1.11214900 0.52733600

H -1.32230200 3.68196100 -1.29809700

H -3.45326500 2.49154300 -0.92009700

O -3.76759400 0.43825100 0.74919600

H -4.49011600 0.85722900 0.25833600

TS2

1 1

C 0.05291100 2.10793100 1.19714400

C 0.92784900 -0.32164200 1.31799400

C 0.89328400 1.07675700 1.88662800

H 0.56319300 2.90107900 0.65322600

H 0.51181900 1.02743500 2.91546100

H 1.91720100 1.45347300 1.91726500

C -1.30204100 2.31718200 1.56124400

C -1.90473600 3.48579100 1.23975500

H -1.80360400 1.56557700 2.16092500

H -2.90569400 3.71973900 1.58963000

H -1.39470100 4.23396700 0.63669600

C -0.16734600 -1.23580300 1.43449900

O -0.12035300 -2.43146900 1.08416300

O -1.27326000 -0.71523600 1.96290100

C 2.08355200 -0.83993800 0.76259700

O 2.19160900 -2.07903000 0.36797700

O 3.14607500 -0.07011400 0.60773500

C -2.38328900 -1.60925500 2.12709000

H -3.23169100 -0.97829700 2.38883200

H -2.57803400 -2.14856300 1.20017100

H -2.17644800 -2.31652600 2.93327500

C 4.33073500 -0.67800600 0.06759400

H 4.13734500 -1.06758300 -0.93354100

H 5.06953900 0.12033800 0.02988500

H 4.67716300 -1.48286000 0.71784800

H 1.26901600 -2.49681600 0.57829600

C -3.43747000 -0.47879200 -1.13976900

C -2.61777000 0.62488300 -1.07372000

C -1.23608200 0.50536800 -1.36070400

C -0.71448100 -0.76167700 -1.73725000

C -1.58073300 -1.88109400 -1.79413600

C -2.91744100 -1.74288400 -1.50273200

H -0.75924800 2.62160400 -1.16405900

H -4.49545700 -0.38062300 -0.91691600

H -3.01905000 1.60015600 -0.81225200

C -0.35547500 1.62357300 -1.28284500

C 0.66480300 -0.86029400 -2.07885000

H -1.16947300 -2.84688500 -2.07417400

H -3.57883000 -2.60179300 -1.55053500

C 1.50165000 0.22339100 -2.01610600

C 0.98902700 1.47859100 -1.60372200

H 1.05485600 -1.82424900 -2.39371700

H 2.55105500 0.13703100 -2.28575900

O 1.76921300 2.57249500 -1.51217700

H 2.69308400 2.34616400 -1.70362900

int2

1 1

C -0.29378700 0.68160100 -0.82174200

C 2.18983200 -0.11852200 -0.69460000

C 1.00925000 0.26853200 -1.53895100

H -0.98361200 0.98245500 -1.61422100

H 1.28692500 1.12949400 -2.15567100

H 0.77237100 -0.54963600 -2.22582700

C -0.13213100 1.84557000 0.11329800

C -0.90379200 2.92846600 0.06962200

H 0.65418600 1.76437400 0.86533600

H -0.76582900 3.75185500 0.76389000

H -1.69390500 3.02989500 -0.67136000

C 3.11266400 0.80719900 -0.24947500

O 4.14923000 0.50372400 0.49169000

O 2.97154200 2.08142300 -0.57702700

C 2.43905200 -1.47189600 -0.29568100

O 3.38711600 -1.83407400 0.42811300

O 1.56021200 -2.36371800 -0.76113000

C 3.95097200 3.00955900 -0.08828500

H 3.64176300 3.97965800 -0.47270700

H 3.95707000 3.02080700 1.00324800

H 4.94334000 2.75262100 -0.46222400

C 1.73103300 -3.70836100 -0.30230000

H 1.65846500 -3.74983800 0.78665200

H 0.92431600 -4.27946800 -0.75885900

H 2.69884900 -4.10201600 -0.61745100

H 4.07257200 -0.51085900 0.63138800

C -4.44836400 -0.24415300 -1.77910300

C -3.09981000 -0.51696400 -1.57221000

C -2.53591400 -0.33942200 -0.31138300

C -3.35167200 0.11912800 0.74240700

C -4.71226600 0.40770700 0.51982700

C -5.25739300 0.22632000 -0.73734800

H -0.71665800 -1.45830800 -0.60293600

H -4.87784000 -0.39938900 -2.76359900

H -2.48262600 -0.87254200 -2.39279500

C -1.06196600 -0.54623700 -0.10262200

C -2.79247000 0.22692500 2.05572400

H -5.31894500 0.76321900 1.34720800

H -6.30475000 0.44135300 -0.91713100

C -1.51145100 -0.15843800 2.36155500

C -0.68474400 -0.62635700 1.33150200

H -3.43564500 0.58916400 2.85456300

H -1.14289300 -0.13611200 3.38187800

O 0.49680700 -1.11202600 1.57914300

H 0.71132600 -1.09330800 2.53290800

TS3

1 1

C 0.49913300 -0.08483800 1.54818600

C -1.84809800 0.17908000 0.58741300

C -1.02012600 0.01828700 1.82992200

H 0.97271400 -0.60136000 2.39014200

H -1.18650400 0.85112700 2.51972500

H -1.34061100 -0.89369100 2.33643300

C 1.16669200 1.26292000 1.43886500

C 2.07916600 1.68048700 2.31205700

H 0.86223600 1.91695200 0.62566500

H 2.52883300 2.66568200 2.23370800

H 2.40502400 1.05068200 3.13706900

C -2.06771500 1.43655600 -0.01398700

O -2.84398600 1.60526300 -1.03569200

O -1.43930700 2.47955200 0.45180200

C -2.77031800 -0.84741200 0.14923500

O -3.50460400 -0.72077800 -0.85152800

O -2.72953300 -1.97496700 0.82943300

C -1.62627600 3.74572400 -0.21525900

H -1.01726200 4.45020300 0.34602900

H -1.28127200 3.67687100 -1.24782200

H -2.67750600 4.03245900 -0.18292900

C -3.54521700 -3.04912900 0.33275300

H -3.24356900 -3.30627000 -0.68426600

H -3.36615200 -3.88351200 1.00735200

H -4.59723600 -2.76181700 0.34693800

H -3.28825000 0.66963700 -1.18455100

C 4.53287000 -1.29817000 0.37825200

C 3.18768000 -1.55591500 0.64322600

C 2.20072600 -0.89423200 -0.07587600

C 2.56291600 0.04553900 -1.05822400

C 3.91522100 0.30528600 -1.30899100

C 4.89823900 -0.36533700 -0.59216300

H 0.50837700 -2.05458700 0.63008300

H 5.29890200 -1.83106900 0.93230500

H 2.90699000 -2.27427800 1.40810700

C 0.73931800 -1.03349900 0.31297700

C 1.52263200 0.71806400 -1.82339800

H 4.18369700 1.03319200 -2.06913300

H 5.94607500 -0.16586800 -0.78892700

C 0.21701300 0.36988300 -1.74809400

C -0.12152200 -0.72809000 -0.87381300

H 1.83114800 1.47201600 -2.54320300

H -0.53123800 0.76532100 -2.42985300

O -0.83287100 -1.72965400 -1.33476800

H -1.24597500 -1.51825600 -2.19532300

int3

1 1

C 0.49241300 0.01588100 1.70042100

C -1.56685700 -0.00701800 0.30996000

C -1.04889000 0.05257300 1.76925400

H 0.89433000 -0.55225400 2.54425200

H -1.42034200 0.94237000 2.27863200

H -1.41396800 -0.81889700 2.31338400

C 1.10612200 1.39046300 1.73145000

C 2.14508900 1.70393300 2.50030100

H 0.66034100 2.14797500 1.08872300

H 2.56775100 2.70402600 2.50381200

H 2.60917400 0.96689800 3.15222500

C -2.24918100 1.26079200 -0.17296800

O -3.14382500 1.24783000 -1.02285000

O -1.75868400 2.35229600 0.32818600

C -2.49116200 -1.18230100 0.06060300

O -3.46200800 -1.11861000 -0.74387300

O -2.22541500 -2.26672900 0.67644600

C -2.27746400 3.60272000 -0.18879600

H -1.73917700 4.37693000 0.35152600

H -2.07873600 3.66122300 -1.25961900

H -3.34832700 3.65963500 0.00561400

C -3.00034600 -3.45560400 0.34487300

H -2.85438100 -3.68049300 -0.71160700

H -2.58986300 -4.23675600 0.97768600

H -4.05027100 -3.27230300 0.57001200

H -3.49856800 -0.10994300 -1.08155300

C 4.50379900 -1.37402800 0.10670800

C 3.16863600 -1.52792600 0.47667100

C 2.18597600 -0.70694300 -0.07031500

C 2.54809900 0.27958600 -1.00197800

C 3.88944300 0.43014400 -1.36787300

C 4.86526300 -0.39238400 -0.81516800

H 0.50275500 -1.83798700 0.61298400

H 5.26122800 -2.02067300 0.53802000

H 2.88601800 -2.29052200 1.19805200

C 0.75869800 -0.79301400 0.39800500

C 1.50458600 1.11407000 -1.60324200

H 4.15977500 1.19498100 -2.09087000

H 5.90450200 -0.27105100 -1.10295000

C 0.19758500 0.89875300 -1.41028000

C -0.28116900 -0.29356600 -0.62018100

H 1.82604000 1.91288500 -2.26705800

H -0.54073700 1.47981200 -1.95827100

O -0.71282500 -1.29360100 -1.53170800

H -0.01931900 -1.42213600 -2.19727400

TS4

1 1

C 0.31620300 1.35528700 1.27050400

C -1.49507300 -0.07148500 0.36071300

C -1.21858000 1.12421100 1.29273100

H 0.77179400 0.79377900 2.09796800

H -1.72418300 1.99608200 0.87116000

H -1.61091500 0.95059000 2.29636600

C 0.60772400 2.81875800 1.49748400

C 1.23805900 3.63137600 0.65387900

H 0.24521200 3.21114800 2.44793800

H 1.39156100 4.67917200 0.89306700

H 1.63083500 3.27592900 -0.29590000

C -2.85931800 -0.06175600 -0.28691900

O -3.43606800 -1.13769200 -0.62270700

O -3.40560400 1.06637100 -0.51257300

C -1.26896600 -1.43582900 1.00986900

O -1.91291700 -2.43788200 0.68238600

O -0.30146900 -1.45653600 1.86701200

C -4.69632200 1.08965500 -1.18979500

H -4.95695300 2.14221500 -1.24543500

H -4.58163600 0.65555200 -2.18271600

H -5.41868000 0.53100700 -0.59547200

C 0.06547700 -2.74828400 2.41707700

H 0.36148400 -3.41039200 1.60305700

H 0.90124000 -2.54272400 3.08010700

H -0.78054400 -3.16226100 2.96528800

H -2.86883100 -1.93223000 -0.16308100

C 4.51210400 0.35325600 0.17946800

C 3.22935300 0.81558800 0.42082700

C 2.12419400 0.26985500 -0.26428400

C 2.36350900 -0.78958700 -1.17805400

C 3.67531500 -1.23965600 -1.41252500

C 4.74705400 -0.67184000 -0.74950300

H 0.18023600 1.62405500 -1.12377100

H 5.34658500 0.79249500 0.71803800

H 3.06882500 1.61375500 1.13878600

C 0.77280600 0.75472900 -0.05822400

C 1.24097200 -1.45165900 -1.80043800

H 3.83036500 -2.05148800 -2.11866000

H 5.75701200 -1.02151100 -0.93495100

C -0.04621200 -1.11212400 -1.56297100

C -0.33629300 0.02988600 -0.69645900

H 1.45319200 -2.29343000 -2.45553800

H -0.86591700 -1.67435300 -2.00185300

O -0.84924000 1.31176400 -1.64240800

H -0.72031700 1.09213300 -2.58835200

int4

1 1

C 2.14269800 -1.89143600 0.75362400

C -0.15718300 -2.01764500 -0.25011100

C 1.06540200 -2.88930400 0.22126100

H 3.08269100 -2.12570000 0.24154500

H 0.76444900 -3.63021100 0.96456900

H 1.44351700 -3.41870900 -0.65462800

C 2.38100500 -2.02636000 2.23690200

C 2.26654800 -1.07186400 3.15519300

H 2.68820000 -3.02590000 2.54214800

H 2.47192400 -1.28060400 4.20033500

H 1.97666300 -0.05004800 2.91503700

C -1.09838700 -1.86897700 0.93896800

O -2.21331600 -2.45742800 0.98746200

O -0.61901600 -1.27151400 1.95382200

C -0.89367900 -2.66828800 -1.41840900

O -2.03551800 -3.11241700 -1.32716800

O -0.17646200 -2.73152300 -2.49831800

C -1.45238300 -1.11651800 3.14063000

H -0.87660400 -0.46571900 3.79303900

H -2.39272100 -0.65055100 2.84532100

H -1.60821900 -2.09799600 3.58755300

C -0.78495200 -3.37217000 -3.64962400

H -1.68029500 -2.82205600 -3.93917700

H -0.02823300 -3.32925200 -4.42840500

H -1.03238700 -4.40382900 -3.39961700

H -2.39542100 -2.84106400 0.02193600

C 4.69593400 1.76281000 0.11988800

C 3.86114200 0.72348800 0.51336400

C 2.64200900 0.54043800 -0.13340700

C 2.26975700 1.43104100 -1.18109600

C 3.13021000 2.49646000 -1.55074600

C 4.33307600 2.65679000 -0.90435900

H 1.12646600 0.00095300 1.11757600

H 5.65316800 1.88765300 0.61634800

H 4.15940000 0.05272600 1.31293200

C 1.66833100 -0.50122100 0.27608800

C 1.07245900 1.21330400 -1.88724500

H 2.82106600 3.16627400 -2.34707300

H 5.00301600 3.46311100 -1.17970600

C 0.21483200 0.12232400 -1.65314400

C 0.53289600 -0.71812200 -0.62980500

H 0.81722200 1.91145600 -2.68126000

H -0.66522300 -0.01714100 -2.26980800

S -1.82550900 1.45862100 0.81536100

O -2.67004500 1.77146500 1.96807300

O -2.17879200 0.20210400 0.11325700

C -2.25588000 2.73864900 -0.42256500

F -1.95094300 3.95050700 0.03318200

F -1.57649800 2.53523700 -1.55729400

F -3.55506400 2.70324200 -0.70427700

O -0.37947600 1.64648700 1.01520000

TS5

1 1

C 1.21948000 0.77394200 1.79688500

C 2.18247500 -0.90658000 0.28536600

C 1.77067300 -0.66306500 1.75576400

H 2.04241900 1.49258300 1.75676500

H 0.96592100 -1.35476800 2.01208300

H 2.60419400 -0.82179000 2.44070500

C 0.36636100 1.03465700 3.01799000

C -0.73425800 0.34464800 3.30731600

H 0.70470200 1.82607300 3.68140600

H -1.30700300 0.55383400 4.20531200

H -1.11223900 -0.44625200 2.65948900

C 1.86291600 -2.30419200 -0.22019000

O 2.55077200 -2.85521900 -1.12594300

O 0.87242200 -2.88823800 0.31079400

C 3.66106500 -0.60956000 0.01105600

O 4.29925400 -1.20643000 -0.85477000

O 4.13434500 0.35886000 0.72803600

C 0.39103300 -4.13849600 -0.26857400

H -0.45239700 -4.41931500 0.35395000

H 0.07980900 -3.93601200 -1.29373800

H 1.18930900 -4.87889800 -0.23103800

C 5.50296500 0.76538600 0.46082200

H 5.58339200 1.08786800 -0.57771600

H 5.68898200 1.58923200 1.14428300

H 6.17246000 -0.07074800 0.66064900

H 3.40696500 -2.25697800 -1.26301300

C -1.43158900 4.15991700 0.30461500

C -1.03932800 2.88829500 0.71148200

C -0.03773100 2.21204200 0.01684800

C 0.54051900 2.82800100 -1.11645800

C 0.13551200 4.11749100 -1.51582900

C -0.84596800 4.78073800 -0.80584900

H -0.44066000 0.19592000 0.59061400

H -2.20860800 4.67651100 0.85901000

H -1.51170900 2.42260100 1.56776800

C 0.42927600 0.85263800 0.44277200

C 1.52133600 2.12301900 -1.87875700

H 0.59752000 4.56940200 -2.38839600

H -1.16722000 5.77125100 -1.10811600

C 1.93820900 0.84365600 -1.59316900

C 1.37104800 0.17704900 -0.49731500

H 1.97573800 2.64229500 -2.71969600

H 2.70653000 0.37033500 -2.19618600

O 0.09582600 -1.15297500 -1.51968200

H -0.27715200 -0.63367500 -2.24987700

S -3.09815400 -1.71739800 -0.16682200

O -3.30292900 -2.11025300 -1.55903700

O -1.66296800 -1.79014800 0.25881200

C -3.34149400 0.09707800 -0.18080200

F -4.56100400 0.42565900 -0.58700200

F -3.14355600 0.60458500 1.03641300

F -2.45029900 0.65430200 -1.01255700

O -4.03539800 -2.21844900 0.82941100

H -0.66235100 -1.41918000 -0.91159600

TS6

1 1

C -1.65004400 -1.22580000 1.69344500

C -2.12752400 0.64604200 0.13373100

C -2.27835300 0.18754400 1.60069500

H -2.40199300 -1.97755000 1.42718200

H -1.70117100 0.86282900 2.23412000

H -3.31928000 0.21127800 1.92276600

C -1.16909800 -1.47694000 3.09861500

C 0.08947500 -1.40708200 3.52184600

H -1.96672900 -1.67799300 3.81172900

H 0.32853800 -1.55556500 4.57027100

H 0.92384400 -1.20542200 2.85416000

C -1.71267000 2.10199100 -0.02561000

O -1.95869000 2.73347700 -1.09512900

O -1.13171200 2.65985200 0.95179900

C -3.35244800 0.38168900 -0.75136200

O -3.58175500 1.04992400 -1.75685400

O -4.04169600 -0.64768900 -0.37439500

C -0.65404600 4.03418800 0.79421400

H -0.16084000 4.25896500 1.73484800

H 0.04432900 4.05485200 -0.04074900

H -1.51554500 4.67930600 0.62481800

C -5.16187200 -1.03152100 -1.21765900

H -4.79934900 -1.23553300 -2.22506900

H -5.56632700 -1.92757600 -0.75509800

H -5.89711500 -0.22690000 -1.22593900

H -2.63921000 2.15137500 -1.64375200

C 1.29443000 -4.47148400 0.44310800

C 0.49280000 -3.45469000 0.93145800

C 0.17660700 -2.36319100 0.11159600

C 0.68455600 -2.33459200 -1.22257400

C 1.52556000 -3.37852900 -1.68704500

C 1.82797000 -4.43240600 -0.86130700

H 0.28272600 -0.46184200 0.90058000

H 1.51770000 -5.32060200 1.08128600

H 0.10353400 -3.50668300 1.94043600

C -0.60385400 -1.20415200 0.56627300

C 0.30273100 -1.29762300 -2.10096500

H 1.91172500 -3.32620200 -2.70041200

H 2.46613400 -5.23763100 -1.20749200

C -0.58963300 -0.28778700 -1.74491500

C -1.05714200 -0.28923300 -0.45094500

H 0.70732700 -1.30878700 -3.10989400

H -0.87823300 0.46401500 -2.47151600

S 1.94337300 1.59722200 0.36940200

O 0.94502800 1.87906600 -0.67440300

O 1.59246700 0.42713200 1.22588200

C 3.37814900 0.97101800 -0.58066300

F 3.80508300 1.89952900 -1.43089800

F 4.37310900 0.64665600 0.23753200

F 3.02607600 -0.11188600 -1.27594300

O 2.44310600 2.75033600 1.10803400

int0

0 1

C 2.52670600 0.65145500 -1.08618600

C 1.41269400 0.34915600 -0.01803900

C 1.17912600 0.23948700 -1.51543700

H 2.74598500 1.71548000 -1.10895600

H 1.03130500 -0.77577200 -1.86644700

H 0.50020100 0.98162400 -1.91807800

C 3.70857800 -0.23182900 -1.21736800

C 4.94921900 0.25017400 -1.21360500

H 3.52588800 -1.29281300 -1.36428600

H 5.80503800 -0.40232600 -1.35151200

H 5.14603200 1.31118500 -1.08234800

C 1.48785700 -0.87048500 0.79569700

O 1.36540400 -0.82990900 2.05823200

O 1.75598300 -1.97539900 0.20718700

C 0.86214400 1.51182700 0.72153300

O 0.59801500 1.46454700 1.92588700

O 0.70057700 2.58560900 -0.00287400

C 1.71478800 -3.18997000 1.00361400

H 1.92032300 -3.99123400 0.29950400

H 2.47701700 -3.14353000 1.78110200

H 0.71637500 -3.28266700 1.43113000

C 0.07680900 3.71205300 0.65014700

H 0.69126100 4.04208900 1.48819300

H 0.01307400 4.48440300 -0.11234200

H -0.91581800 3.42292200 0.99723300

S -1.98896600 -1.22335200 -0.28337300

O -3.17749800 -2.02886800 -0.00052500

O -1.40128100 -1.38931100 -1.61764500

C -2.63062300 0.49297200 -0.31812300

F -3.19145700 0.82275000 0.84459300

F -1.63146900 1.36082800 -0.54785200

F -3.53694100 0.65089600 -1.28092000

O -1.00653500 -1.15553500 0.81823800

H 1.00446600 0.13589200 2.27698200

int0-Al

0 1

C 2.68460100 0.84461600 0.39928900

C 1.55053100 0.51182200 -0.65829600

C 2.95758200 0.93354000 -1.04459400

H 2.46046500 1.77335200 0.91827200

H 3.55176700 0.14446800 -1.49227700

H 3.03528000 1.91170500 -1.50322600

C 3.22169000 -0.23792000 1.25385200

C 3.25098700 -0.13102300 2.58059700

H 3.62286800 -1.11680000 0.75603100

H 3.67272700 -0.91784400 3.19713600

H 2.85833200 0.74617100 3.08828200

C 1.11930100 -0.89145300 -0.81289800

O -0.04958200 -1.26945800 -0.66823400

O 2.06737400 -1.72495900 -1.12331400

C 0.46433500 1.50016000 -0.70504800

O -0.74528900 1.22958300 -0.55162500

O 0.84099000 2.72278700 -0.89738900

C 1.70496800 -3.12400800 -1.22108400

H 2.63342100 -3.63943600 -1.45313400

H 1.29496900 -3.46082000 -0.26865800

H 0.97422200 -3.25401300 -2.01930800

C -0.18111300 3.75358300 -0.87262200

H -0.70860300 3.71898600 0.08037800

H 0.36218500 4.68713700 -0.99110800

H -0.87257000 3.59177100 -1.69922200

Al -1.62885400 -0.32392000 0.14015000

Cl -2.88830000 -1.65433300 -1.11966900

Cl -0.83502300 -0.95857600 2.12984500

Cl -3.29169000 1.04860200 0.87065900

TS2-T

0 1

C -1.31125300 -0.98419600 1.93066500

C -0.31985100 -0.61714000 -0.43691700

C -0.12476200 -0.95497500 1.01841900

H -1.39587500 -0.19432200 2.67294500

H 0.32857900 -1.95300700 1.07851600

H 0.59917100 -0.24711000 1.42612200

C -2.01984500 -2.18754000 2.19437200

C -2.80463800 -2.27649300 3.29016100

H -1.87205000 -3.03254400 1.53143800

H -3.30047400 -3.20435800 3.55870200

H -2.95310300 -1.42099200 3.94529600

C -0.95305900 -1.50738000 -1.34955000

O -1.00596200 -1.35133800 -2.58490400

O -1.54483100 -2.56268100 -0.76899800

C 0.24708100 0.51870900 -0.98890900

O 0.21010700 0.78297000 -2.26838800

O 0.80416000 1.41867900 -0.20867500

C -2.20710100 -3.47430200 -1.64801300

H -2.65358000 -4.23350300 -1.00665000

H -2.97840100 -2.96019100 -2.22623300

H -1.49387200 -3.93449300 -2.33463400

C 1.62217500 2.42247500 -0.82291000

H 1.04247000 3.00514500 -1.53989400

H 1.95533000 3.06085200 -0.00595200

H 2.47207200 1.94586000 -1.31395900

S 3.55430900 -1.09447500 -0.30174800

O 4.85371200 -1.66460200 -0.67438100

O 2.71690100 -1.94493100 0.55601500

C 4.02141100 0.27835300 0.82366200

F 4.64883400 1.25184600 0.15550500

F 2.94811400 0.81835100 1.41172000

F 4.83885700 -0.15055000 1.78888700

O 2.84279900 -0.40246300 -1.38685300

H -0.24875900 -0.02622700 -2.68818800

C -1.41697400 3.75799700 1.24577800

C -2.03228400 2.60078000 1.66882700

C -2.55945100 1.68622900 0.72785600

C -2.45317500 1.98433900 -0.65645400

C -1.81546600 3.17904400 -1.06516200

C -1.30716900 4.05221200 -0.13077800

H -3.46067200 0.32788300 2.17525000

H -1.01343100 4.45299300 1.97550400

H -2.12074400 2.37763200 2.72894200

C -3.18810300 0.46699100 1.13536800

C -2.99191800 1.06199400 -1.60174800

H -1.73116100 3.38975800 -2.12799000

H -0.81638300 4.96669700 -0.44821600

C -3.59965000 -0.09692000 -1.20634900

C -3.71999700 -0.39247700 0.17754100

H -2.90517300 1.29193900 -2.66029800

H -4.00703300 -0.79219000 -1.93609100

O -4.37677400 -1.48286900 0.60328900

H -4.63480800 -2.03335500 -0.15361500

TS3-T

0 1

C 1.67480800 1.15586900 1.75145700

C 0.20113600 0.61009300 -0.24457800

C 0.29845300 0.62932700 1.25390800

H 1.95577400 0.61647600 2.65899300

H -0.50871500 1.23675100 1.67245100

H 0.16570100 -0.38989900 1.61907800

C 1.64786100 2.61884100 2.13246000

C 2.26215000 3.09438900 3.21219900

H 1.07176200 3.28267600 1.49383700

H 2.21613500 4.14736100 3.47342700

H 2.83462600 2.44638800 3.87308200

C -0.34547500 1.72044800 -0.99547500

O -0.50814400 1.69832600 -2.23205800

O -0.58910100 2.80633800 -0.28715800

C 0.11225500 -0.62194000 -0.94286600

O 0.03369200 -0.67639000 -2.22807200

O 0.16742100 -1.74593100 -0.28207700

C -1.26967200 3.86389000 -0.97230900

H -1.38677100 4.65972400 -0.23917100

H -0.68255100 4.21339200 -1.82384900

H -2.24474400 3.50978000 -1.31116800

C -0.10045400 -2.95476400 -1.01008200

H 0.67396600 -3.12673500 -1.76046200

H -0.08541200 -3.74507100 -0.26210300

H -1.08220100 -2.87869400 -1.47994200

S -3.43245000 -0.12411200 -0.36174300

O -4.86762900 -0.09562900 -0.65964700

O -2.85623500 1.15143900 0.09068500

C -3.33301400 -1.17895900 1.13318600

F -3.90080700 -2.36785000 0.91417400

F -2.05951600 -1.39400400 1.47891000

F -3.95200700 -0.61030500 2.17012100

O -2.60306200 -0.86873400 -1.32338100

H -0.20835100 0.30107400 -2.51061900

C 3.21570400 -2.90498700 1.48805300

C 3.00163300 -1.53702000 1.63191900

C 2.96667900 -0.69641700 0.51965300

C 3.19065700 -1.26612300 -0.75445000

C 3.42544300 -2.64434700 -0.88669700

C 3.42583700 -3.46667500 0.22754900

H 3.68792900 1.26390800 0.97601400

H 3.22138700 -3.53718900 2.37016100

H 2.85260800 -1.13530900 2.62794300

C 2.73625300 0.79770000 0.66959900

C 3.13331400 -0.44692500 -1.94474000

H 3.59346900 -3.05320100 -1.87909000

H 3.59399600 -4.53316100 0.12311000

C 2.74084700 0.84693700 -1.90481600

C 2.40220100 1.43318300 -0.64448000

H 3.38924500 -0.90878600 -2.89461600

H 2.65783600 1.45013900 -2.80460600

O 2.21633600 2.73936800 -0.58402400

H 2.14855600 3.13016600 -1.47451100

TS2′

1 1

C -1.26517300 -1.03776600 -1.72417500

C -0.22142900 1.20557200 -0.94660600

C -0.66691600 0.29569300 -2.06485800

H -0.66187100 -1.92163700 -1.91381800

H -1.43327200 0.81715500 -2.65403800

H 0.19487800 0.11090300 -2.70906900

C -2.66324600 -1.21556500 -1.59674700

C -3.18931900 -2.46273300 -1.62877500

H -3.29661100 -0.33929000 -1.51823200

H -4.26255200 -2.62439400 -1.60105200

H -2.55303000 -3.34245000 -1.69617500

C -1.15230900 1.84419700 -0.06769700

O -0.85400700 2.70670200 0.77861200

O -2.41278100 1.42600200 -0.21039800

C 1.10539900 1.55673100 -0.77971600

O 1.50315000 2.43157400 0.10764500

O 2.03790300 1.00703200 -1.53249200

C -3.38174800 2.00839400 0.66882400

H -4.32970500 1.53692900 0.41319500

H -3.12304000 1.80693900 1.71086700

H -3.44052900 3.08697700 0.51278100

C 3.36105700 1.56392100 -1.47086400

H 3.73568000 1.56194200 -0.44808200

H 3.97236700 0.91848500 -2.09903400

H 3.35435100 2.58176200 -1.86669400

H 0.64360200 2.74756800 0.56913200

C 3.16586300 -2.14977700 -0.20832500

C 1.81786500 -2.42840000 -0.23320700

C 0.91735000 -1.67751900 0.55840200

C 1.42589900 -0.64034700 1.38483700

C 2.81581000 -0.37471600 1.39304500

C 3.67143400 -1.11631300 0.61092900

H -0.86628700 -2.83023900 0.06884000

H 3.84914300 -2.73090300 -0.81959300

H 1.43028200 -3.22884000 -0.85798500

C -0.48860800 -1.93013000 0.53997700

C 0.51428800 0.10853400 2.18575500

H 3.19120500 0.42525400 2.02568400

H 4.73666200 -0.90876500 0.61930900

C -0.82969800 -0.14242000 2.16670200

C -1.34067000 -1.18383700 1.34672300

H 0.90609400 0.89999900 2.81899000

H -1.51254500 0.43300200 2.78644200

O -2.64548700 -1.50365100 1.34972400

H -3.14013700 -0.88280200 1.90845000

TS3′

1 1

C -0.00730200 1.88776400 0.83329100

C -1.22233500 -0.29571900 0.73315700

C -1.22880900 1.07171200 1.35888400

H 0.81305400 1.72249600 1.53628900

H -2.15561700 1.57581200 1.08110800

H -1.18909300 1.01278300 2.44979800

C -0.33641500 3.35807700 0.85973900

C -0.46472500 4.19219800 -0.16778700

H -0.51559500 3.73999500 1.86496300

H -0.73211200 5.23100900 -0.00094300

H -0.31919700 3.89238600 -1.20200300

C -2.42227900 -0.93585500 0.29812000

O -2.43815900 -2.16011300 -0.09743300

O -3.51055100 -0.23718600 0.20509500

C -0.18241600 -1.25754900 1.11252000

O -0.15935300 -2.42455500 0.68857900

O 0.73055800 -0.78382800 1.92991800

C -4.69309800 -0.88321700 -0.32838200

H -5.46082800 -0.11390200 -0.31512700

H -4.50112900 -1.22530300 -1.34588100

H -4.97121800 -1.72125500 0.31074000

C 1.84015300 -1.65092700 2.22777300

H 2.34909900 -1.92865200 1.30204700

H 2.49624400 -1.06964200 2.87163400

H 1.48463700 -2.54423100 2.74332500

H -1.47560300 -2.52804400 0.11035900

C 4.09029300 0.43563900 0.13348700

C 2.85887500 1.08407100 0.16028300

C 1.76003500 0.55530000 -0.51674800

C 1.92211000 -0.63807700 -1.24678500

C 3.16772900 -1.28614100 -1.26611600

C 4.24809000 -0.75568700 -0.57745000

H 0.58810300 2.14132500 -1.24496500

H 4.93304000 0.86672900 0.66428700

H 2.75826900 2.01921500 0.70389000

C 0.44418000 1.30988200 -0.54135100

C 0.81041300 -1.18754900 -2.00798000

H 3.27202200 -2.20648500 -1.83384900

H 5.20906100 -1.25838900 -0.59731800

C -0.41937300 -0.63632100 -1.99525000

C -0.67755700 0.50855000 -1.14805700

H 1.00326900 -2.06470600 -2.61987200

H -1.23975100 -1.04681900 -2.57884300

O -1.73447600 1.28225800 -1.40632800

H -2.37623300 0.83615600 -1.98637100

TS5-AcOH

1 1

C 0.21210700 0.68126200 1.91708900

C 1.94424600 -0.02741200 0.28165700

C 1.59416900 -0.00282400 1.80062000

H 0.34234100 1.76737100 1.93465200

H 1.51632300 -1.02604500 2.16703500

H 2.36367800 0.51101100 2.37676400

C -0.52759400 0.22962800 3.15405100

C -1.08701500 -0.96980600 3.29358000

H -0.54806200 0.93672900 3.97970000

H -1.56719900 -1.25702600 4.22372700

H -1.09916400 -1.70592200 2.48914500

C 2.25706100 -1.43233200 -0.21104000

O 3.15587300 -1.65782500 -1.07041000

O 1.60305600 -2.37759300 0.32973600

C 3.08304800 0.91987900 -0.09262600

O 3.93680200 0.63841900 -0.93062400

O 3.01807900 2.05830800 0.52745800

C 1.72265200 -3.71867900 -0.23137900

H 0.98041000 -4.30410700 0.30248900

H 1.49645700 -3.66091000 -1.29570000

H 2.73268900 -4.08606800 -0.05206000

C 4.02927100 3.04300200 0.19214800

H 3.95857000 3.28600200 -0.86852700

H 3.79791200 3.90663300 0.80947300

H 5.01493800 2.64277600 0.42880000

H 3.63972400 -0.74756600 -1.25319800

C -4.06687300 1.53530700 0.55354800

C -2.92064300 0.83683000 0.91449900

C -1.73283200 1.03539800 0.21186200

C -1.72761200 1.94341500 -0.87577500

C -2.89998300 2.64947600 -1.22615400

C -4.06347700 2.44293100 -0.51644800

H -0.70373600 -0.78025800 0.61321100

H -4.98452400 1.36964400 1.10932400

H -2.95038500 0.13488000 1.73965900

C -0.47945000 0.30225500 0.56165400

C -0.54220000 2.11968000 -1.63654700

H -2.86802200 3.33800500 -2.06520600

H -4.97129100 2.97304400 -0.78184800

C 0.62988700 1.41802000 -1.40512700

C 0.64230400 0.48133600 -0.38278900

H -0.56117800 2.85344700 -2.43962000

H 1.50514800 1.60050300 -2.02059900

O 0.36099300 -1.38961000 -1.71276600

H -0.27798900 -0.97538000 -2.31429300

C -2.42485000 -1.99752000 -0.82467500

O -2.41393500 -1.17949300 -1.75912800

O -1.37208500 -2.52366500 -0.30160400

C -3.74745100 -2.43888200 -0.21745200

H -3.89125600 -3.50793800 -0.40081400

H -3.72590000 -2.29789500 0.86694300

H -4.57965900 -1.88110500 -0.64772600

H -0.29867200 -1.94395000 -1.12677600

TS5-MsOH

1 1

C 0.59780800 0.58343600 1.75152200

C 1.58499700 -1.10646500 0.28455500

C 0.88699700 -0.92324000 1.64690300

H 1.52300400 1.13175100 1.94598600

H -0.06089300 -1.46459000 1.61812200

H 1.49161600 -1.30184600 2.47148700

C -0.42692800 0.93269900 2.80660600

C -1.59461600 0.30894200 2.95531800

H -0.16656900 1.75625800 3.46688400

H -2.28515100 0.61093800 3.73719800

H -1.91424500 -0.51037100 2.31245800

C 1.24403500 -2.40696900 -0.42545200

O 2.00504400 -2.89219600 -1.31501300

O 0.17446400 -2.98507000 -0.08004800

C 3.11493900 -0.98422400 0.34139200

O 3.83495600 -1.51082100 -0.50457000

O 3.54912300 -0.24430400 1.31153500

C -0.31836700 -4.10296400 -0.87546800

H -1.25346100 -4.38261900 -0.40031700

H -0.47758000 -3.74313400 -1.89210600

H 0.41073300 -4.91173100 -0.84398800

C 4.98360700 -0.02642800 1.37607800

H 5.30917900 0.48143500 0.46785300

H 5.13373500 0.59832100 2.25196900

H 5.48873700 -0.98572800 1.48480800

H 2.91323400 -2.38158500 -1.24363500

C -1.13033400 4.48101800 0.12724000

C -0.99404300 3.15134800 0.51318900

C -0.04454100 2.33787700 -0.10571400

C 0.74703600 2.88232700 -1.14277900

C 0.59773000 4.23095900 -1.52366300

C -0.33656100 5.02638400 -0.88998100

H -0.84503800 0.39367400 0.21796900

H -1.86682900 5.10398400 0.62456800

H -1.62002400 2.74849700 1.30195400

C 0.13032600 0.90418000 0.28566300

C 1.69656300 2.05216700 -1.81472700

H 1.21912300 4.62400800 -2.32264900

H -0.45958200 6.06430200 -1.17854200

C 1.88435300 0.71877000 -1.53272700

C 1.08931700 0.12306800 -0.54258800

H 2.32232700 2.51713700 -2.57333700

H 2.65210700 0.15578800 -2.05244400

O -0.23294600 -1.00765500 -1.78133100

H -0.42407900 -0.42739000 -2.53387600

S -3.54344100 -1.06828800 -0.11653400

O -4.14812900 -1.64760300 -1.32253100

O -2.04126300 -1.29427600 -0.08470000

O -4.14564000 -1.45762800 1.16478900

H -1.09115600 -1.13227100 -1.23367800

C -3.71429400 0.70218900 -0.24578900

H -3.23265800 1.04510700 -1.16362900

H -4.77725100 0.94777200 -0.26983000

H -3.24722000 1.16087400 0.62879500

TS5-FTA

1 1

C 0.90255900 0.78261200 1.88859200

C 2.35881200 -0.42808300 0.27497000

C 2.05066200 -0.25280100 1.79942800

H 1.32269800 1.79297800 1.86128600

H 1.71157800 -1.20370600 2.21048000

H 2.93786600 0.06454800 2.34662600

C 0.08390800 0.60667300 3.14307900

C -0.85934900 -0.31567200 3.31501300

H 0.34229400 1.27243600 3.96326500

H -1.37495900 -0.41229300 4.26530600

H -1.16461000 -1.00085800 2.52530700

C 2.17617700 -1.86825200 -0.17544000

O 2.96950900 -2.42846900 -0.98103300

O 1.18914400 -2.48894900 0.32874100

C 3.74901900 0.06634000 -0.11974400

O 4.46727100 -0.52929100 -0.92071700

O 4.06651600 1.18814300 0.44783700

C 0.85130100 -3.81086400 -0.19033100

H -0.08460800 -4.06241100 0.29800200

H 0.72792500 -3.73257600 -1.27033200

H 1.64983300 -4.50289600 0.07362600

C 5.34305500 1.77266500 0.08200800

H 5.35528900 1.97062400 -0.99017500

H 5.40318000 2.69582500 0.65197400

H 6.14603200 1.08813900 0.35465200

H 3.74321100 -1.73996300 -1.17548300

C -3.06285100 2.61151800 0.44059300

C -2.14761800 1.62583100 0.79554200

C -0.89419800 1.58932800 0.19053400

C -0.58096100 2.55774900 -0.79375600

C -1.51376700 3.56180000 -1.13118300

C -2.74869900 3.58652400 -0.51578500

H -0.35868700 -0.43323700 0.62462300

H -4.04155700 2.61719000 0.90961400

H -2.41962600 0.87134200 1.52501700

C 0.12132400 0.55355400 0.54595200

C 0.65983600 2.47802200 -1.48490300

H -1.24997700 4.29243400 -1.88997600

H -3.47729100 4.34543100 -0.77756500

C 1.57735700 1.46086300 -1.29641000

C 1.27368700 0.45724800 -0.38157600

H 0.89125600 3.26215100 -2.20194600

H 2.49940400 1.44933500 -1.86784100

O 0.50833100 -1.09194400 -1.79310100

H 0.12510300 -0.53672000 -2.48902900

C -2.41174200 -1.11961700 -0.94087800

O -2.36219500 -0.32097400 -1.87288300

O -1.51996700 -1.91832000 -0.52017600

C -3.73310700 -1.21797000 -0.14357800

H -0.31376100 -1.49315000 -1.32568000

F -4.43492900 -2.29797900 -0.52238700

F -3.50585100 -1.34032700 1.17719700

F -4.51387600 -0.14735900 -0.31523900

TS5-TsOH

1 1

C -1.00319000 -0.70836300 1.79797800

C -2.67183200 0.12965100 0.22734600

C -2.04694300 0.40440500 1.60818000

H -1.50404900 -1.65874700 1.99773500

H -1.53595800 1.36901200 1.56628300

H -2.79687700 0.42694300 2.39955900

C -0.00937400 -0.42781000 2.90266500

C 0.64642200 0.72153800 3.05411300

H 0.16183500 -1.24165800 3.60281100

H 1.34381600 0.85252400 3.87635400

H 0.52440900 1.56426800 2.37563700

C -3.09838400 1.37332900 -0.53356500

O -3.95717600 1.31423500 -1.46375000

O -2.56465600 2.46694300 -0.19166900

C -3.86925900 -0.83315100 0.26193100

O -4.71081000 -0.84308900 -0.63416000

O -3.87077200 -1.64155000 1.27311800

C -2.77488300 3.64960600 -1.01822500

H -2.17296600 4.42051500 -0.54698000

H -2.42010100 3.42448100 -2.02402500

H -3.83435100 3.90269500 -1.01334800

C -4.94669500 -2.61560600 1.32965800

H -4.90053200 -3.25311400 0.44653600

H -4.76298100 -3.18505400 2.23648900

H -5.90142400 -2.09237700 1.37817200

H -4.41519600 0.37759100 -1.39048600

C 2.53164000 -3.22254900 0.47921900

C 1.70924100 -2.14196900 0.78235400

C 0.54024000 -1.93019100 0.05431900

C 0.22958500 -2.80641500 -1.01116900

C 1.07758100 -3.88984600 -1.31448500

C 2.22162100 -4.09909800 -0.56844000

H 0.21370700 0.15283100 0.29168400

H 3.43344900 -3.38312700 1.06256400

H 1.98286100 -1.45793700 1.57826100

C -0.36807900 -0.78162800 0.36411800

C -0.95147500 -2.58324300 -1.78506600

H 0.81915000 -4.54646800 -2.13985700

H 2.87824700 -4.93225600 -0.79394100

C -1.82805600 -1.54690900 -1.56335100

C -1.54382900 -0.63237000 -0.53827600

H -1.18040500 -3.29903600 -2.57137900

H -2.73113900 -1.45904700 -2.15761600

O -0.98774800 1.03407400 -1.74605000

H -0.43951700 0.64772200 -2.44585700

S 1.61705600 2.90446200 0.01016700

O 1.80387200 3.68886600 -1.21575400

O 0.23663700 2.27485000 0.04786900

O 1.90984400 3.58013900 1.27833200

H -0.39412000 1.61634900 -1.14741200

C 2.74214300 1.52122900 -0.10200200

C 3.51399800 1.15796500 0.99559700

C 2.84536000 0.82328600 -1.30650600

C 4.40935300 0.09471500 0.87852800

H 3.42506200 1.71818600 1.92090400

C 3.73704900 -0.23662800 -1.40770300

H 2.25190600 1.12820000 -2.16411200

C 4.54000800 -0.60862600 -0.32087800

H 5.02235200 -0.18514200 1.73107200

H 3.82411300 -0.77984700 -2.34527400

C 5.53129700 -1.73302100 -0.45976200

H 5.88083000 -2.07856300 0.51609700

H 5.09362700 -2.58098500 -0.99492700

H 6.40657200 -1.40491700 -1.03056400

TS7

1 1

C 0.30370900 1.17731500 1.38596100

C -1.48444300 -0.23859500 0.45022200

C -1.21217700 0.87343000 1.46493700

H 0.81833700 0.55797300 2.13564100

H -1.78311600 1.75291200 1.15463100

H -1.53312200 0.59676300 2.47131400

C 0.55658100 2.61222200 1.79266100

C 1.47296900 3.44574100 1.30090400

H -0.06683200 2.95937600 2.61828900

H 1.58616400 4.44856200 1.70145400

H 2.16132400 3.15786600 0.50860300

C -2.88107100 -0.27774800 -0.09475700

O -3.33575000 -1.33041700 -0.63815400

O -3.59025800 0.78202900 -0.04182200

C -1.10517900 -1.64013300 0.89818100

O -1.63690800 -2.64672400 0.41469200

O -0.13708900 -1.69021700 1.75573400

C -4.90361600 0.76646400 -0.66791100

H -5.30227000 1.76210000 -0.49712800

H -4.78586900 0.56460700 -1.73259200

H -5.51959100 0.00498200 -0.19060600

C 0.36771500 -3.00485000 2.10009300

H 0.71867400 -3.50103800 1.19482800

H 1.18862900 -2.81969100 2.78754200

H -0.42313000 -3.58450100 2.57599500

H -2.66063700 -2.11818700 -0.34034500

C 4.41544600 0.01511700 0.34647600

C 3.15177200 0.52331600 0.58536500

C 2.04548700 0.14799900 -0.21729600

C 2.28245400 -0.81573400 -1.23634900

C 3.57896200 -1.30707600 -1.47195100

C 4.64731300 -0.89406200 -0.69921600

H 0.83015900 2.16785700 -0.90502100

H 5.24064200 0.32639100 0.98069100

H 3.00427600 1.22695400 1.39941500

C 0.72648200 0.69396200 -0.00639400

C 1.14916700 -1.35284300 -1.94434900

H 3.72005400 -2.03798100 -2.26475600

H 5.64535100 -1.27650800 -0.88397700

C -0.11969200 -0.97171200 -1.68606500

C -0.41080000 0.09722800 -0.71472000

H 1.32936300 -2.13146700 -2.68206200

H -0.95659600 -1.45635600 -2.18680000

O -1.27785600 1.18738700 -1.54039300

H -1.38107600 0.83401700 -2.44344300

O 0.35975200 2.89554900 -1.49895500

H -0.55573000 2.22934100 -1.61205200

H 0.18340900 3.65493900 -0.91319200
